# Supplementary material
Source: PubMed Central journal article supplement (PMC5356508)
Supplement: NIHMS849116-supplement-SI.pdf [file NIHMS849116-supplement-SI.pdf]

# Synthesis and Evaluation of Paclitaxel-Loaded Gold Nanoparticles for Tumor-Targeted Drug Delivery

Giulio F. Paciotti, Jielu Zhao, Shugeng Cao, Peggy J. Brodie, Lawrence Tamarkin, Marja Huhta,

Lonnie D. Myer, Jay Friedman, and David G. I. Kingston

## Supporting Information

|                                                          |   |
|----------------------------------------------------------|---|
| Cover page                                               | 1 |
| $^1\text{H}$ NMR spectrum of <b>3</b>                    | 2 |
| $^1\text{H}$ and $^{13}\text{C}$ NMR spectra of <b>4</b> | 3 |
| $^1\text{H}$ and $^{13}\text{C}$ NMR spectra of <b>5</b> | 4 |
| $^1\text{H}$ NMR spectrum of <b>6</b>                    | 5 |
| Figures <b>S1</b> and <b>S2</b>                          | 6 |
| Figure <b>S3</b>                                         | 7 |

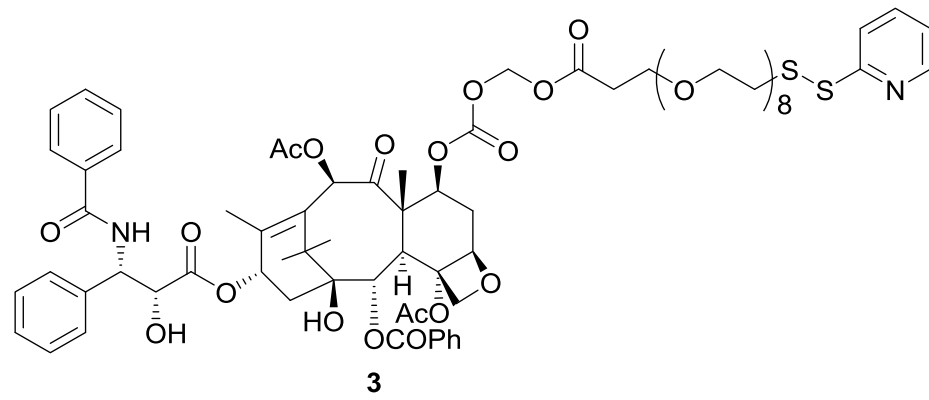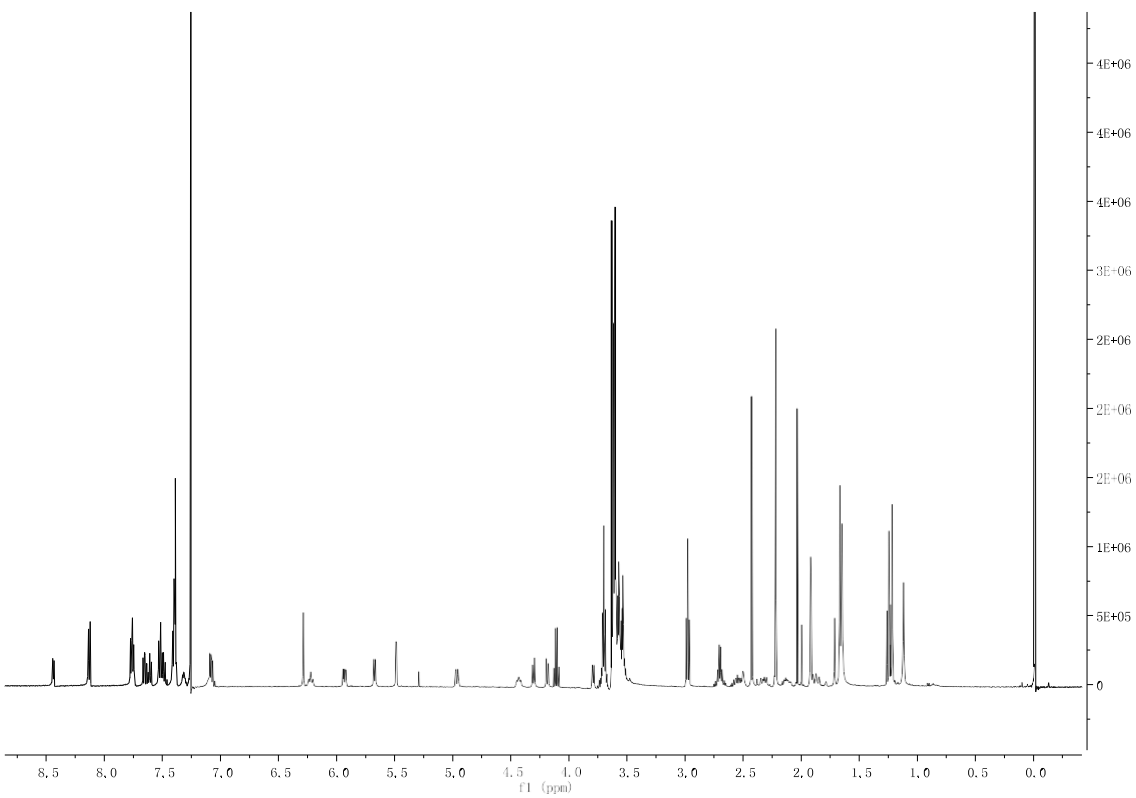

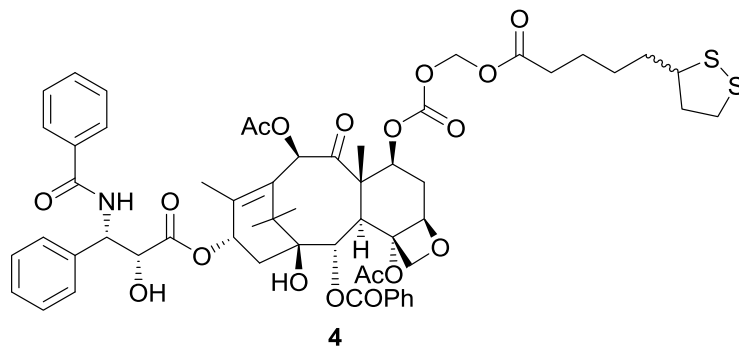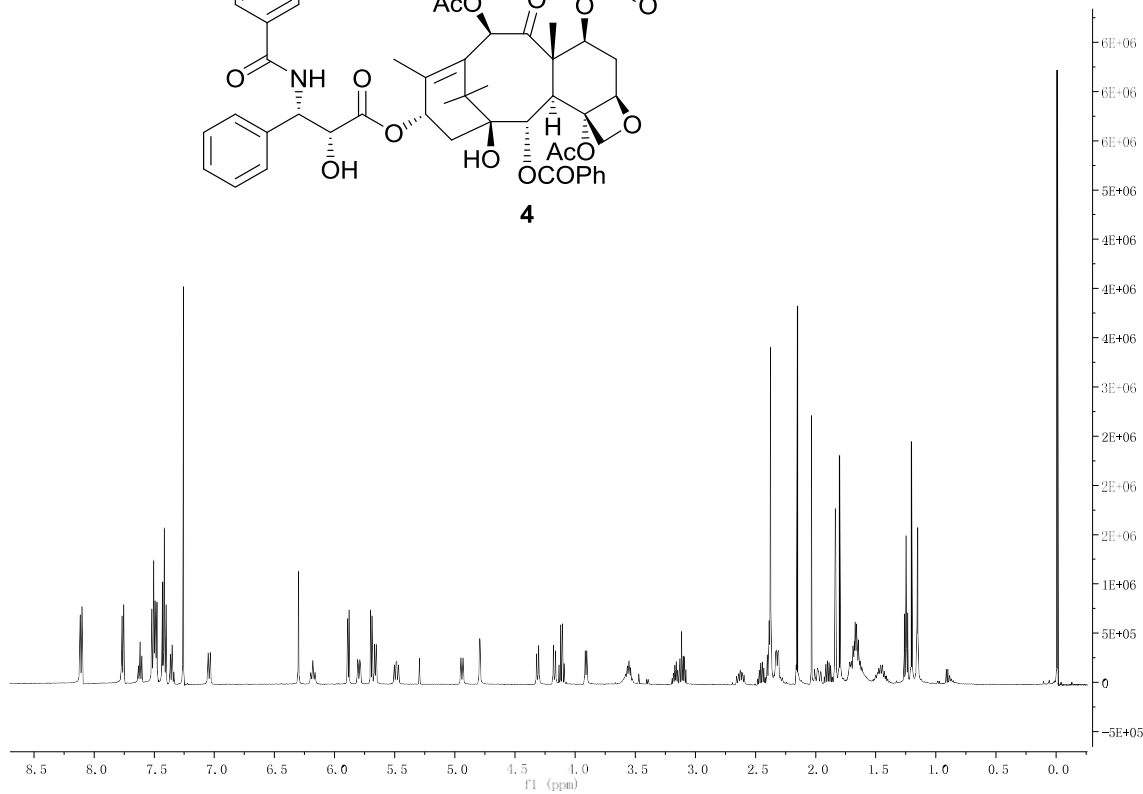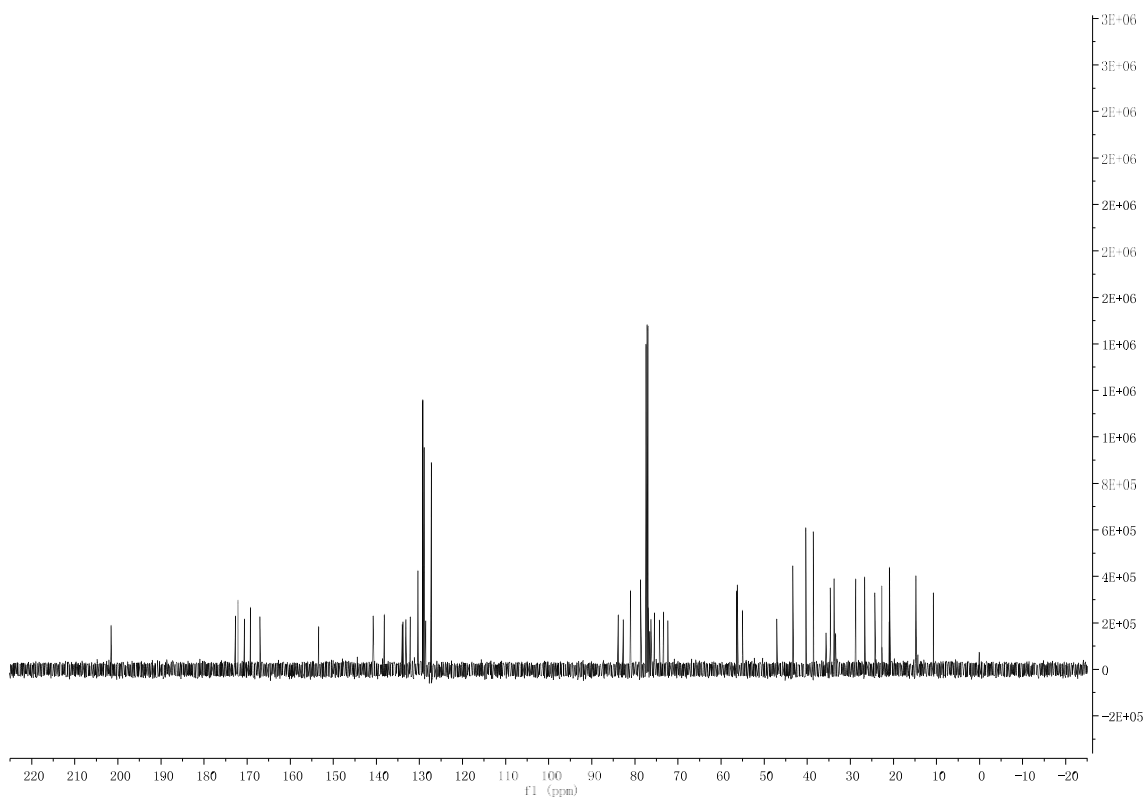

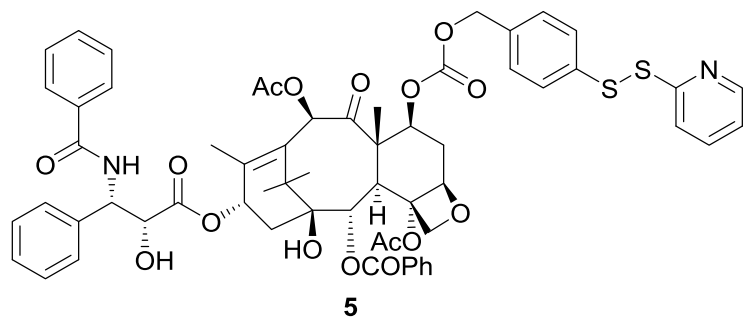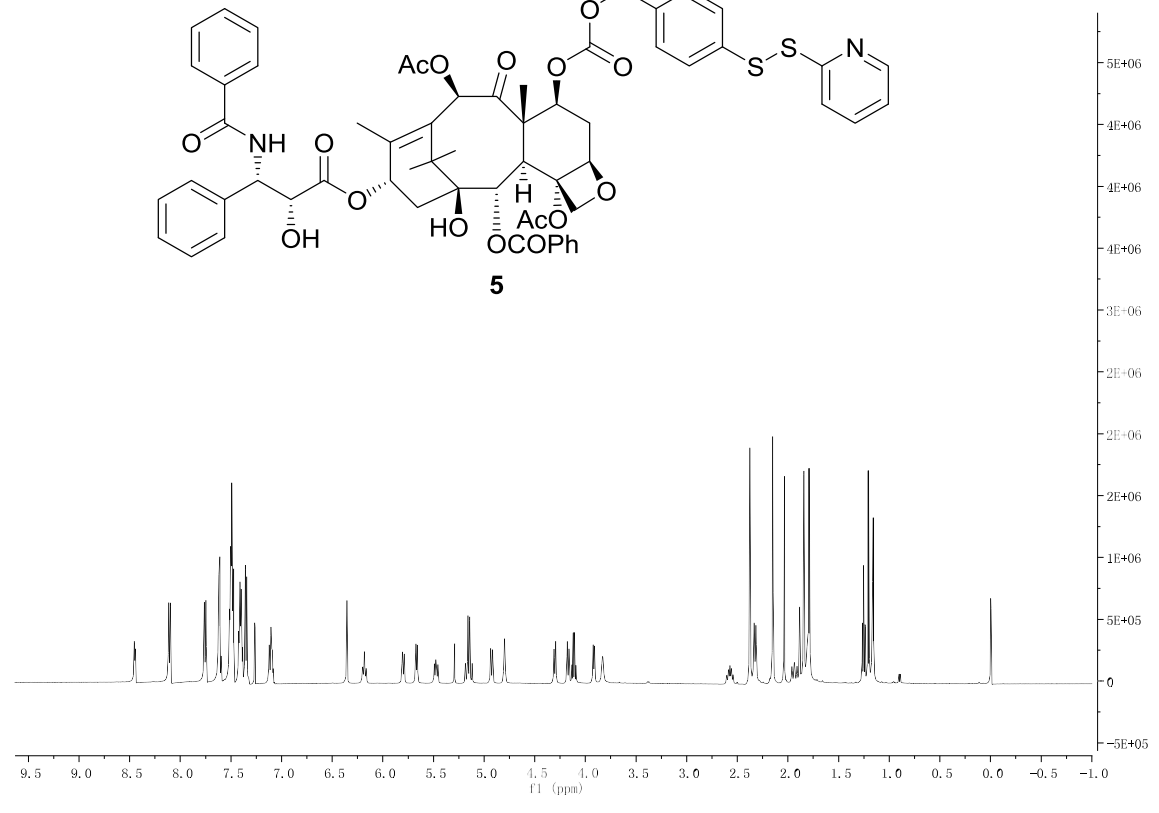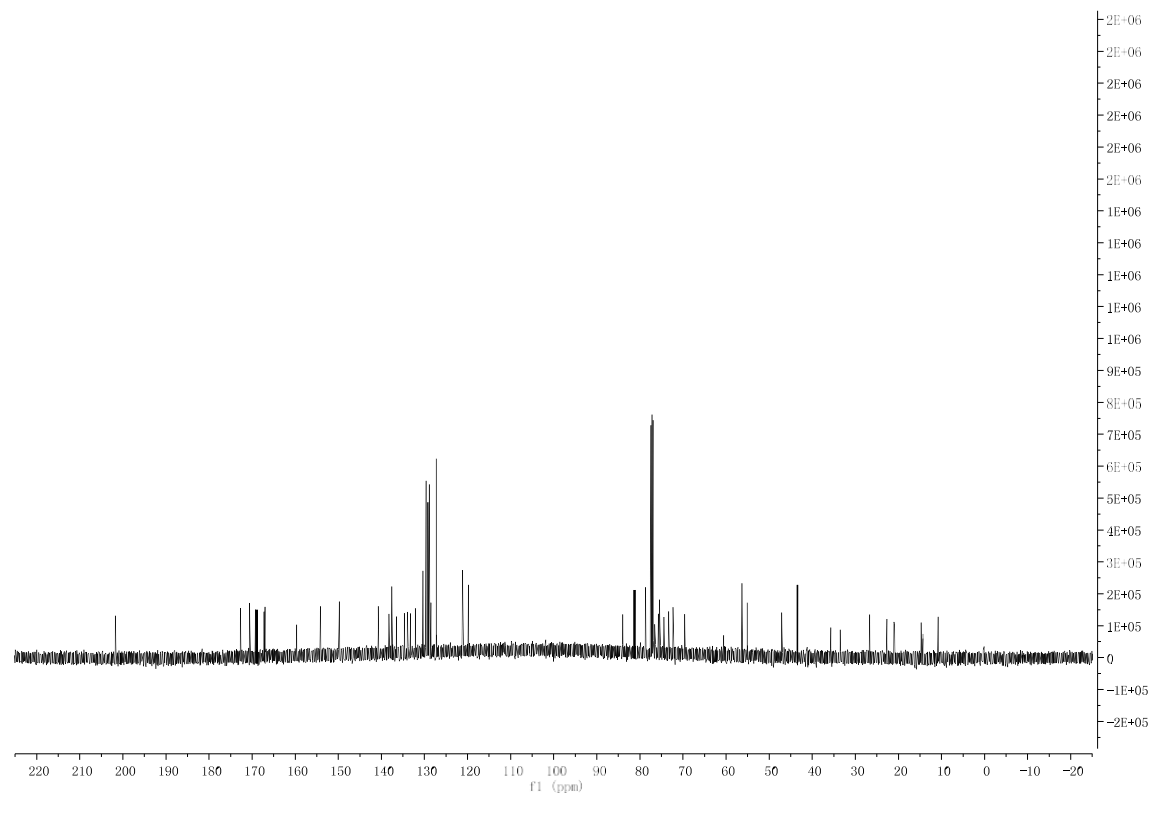

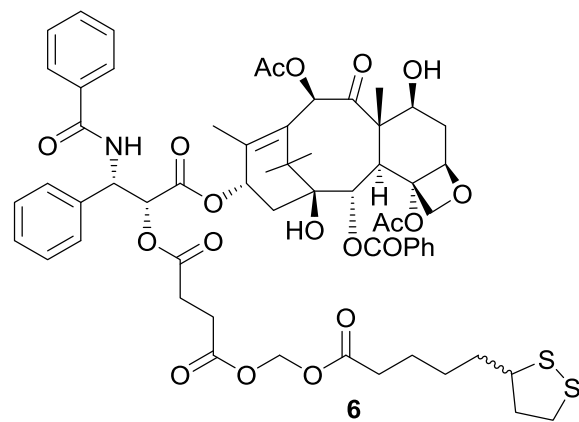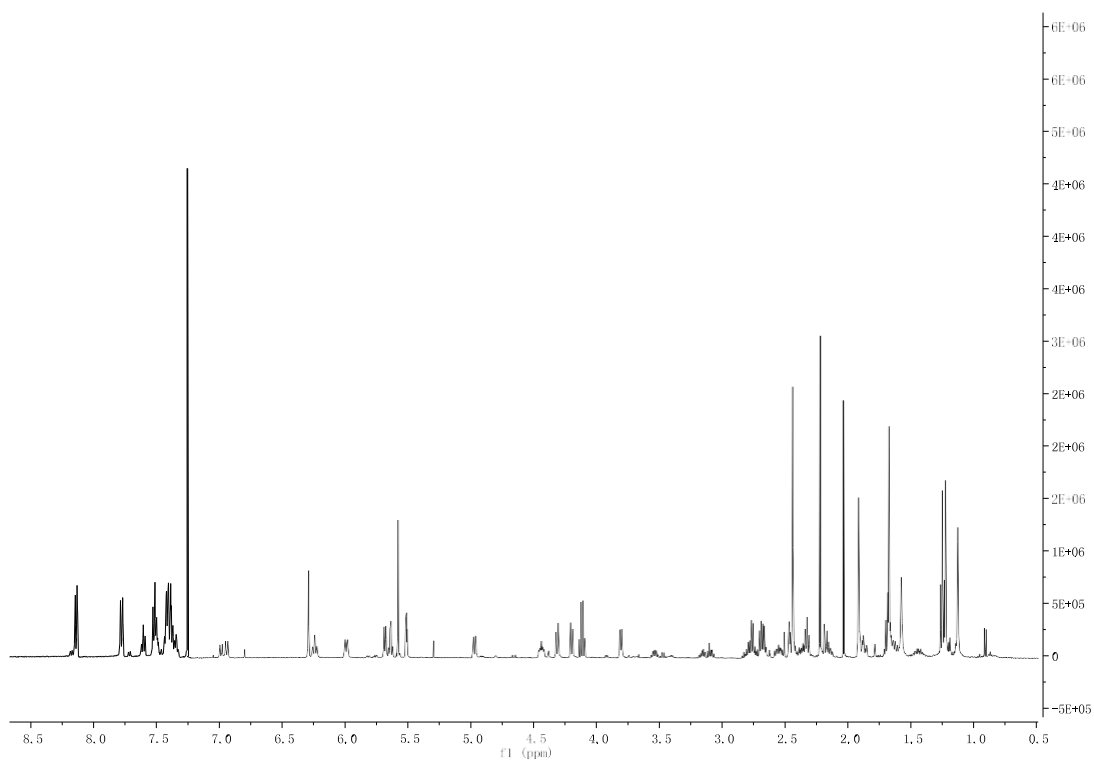

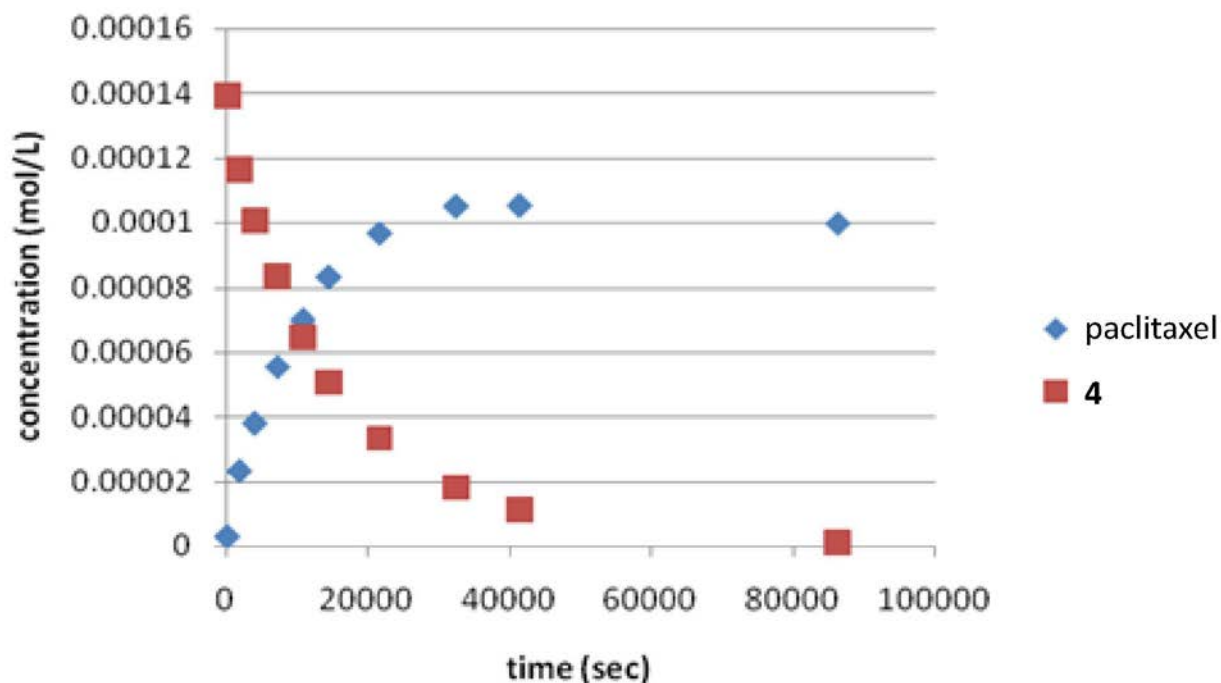

**Figure S1.** Hydrolytic conversion of **4** to paclitaxel at pH 7.4

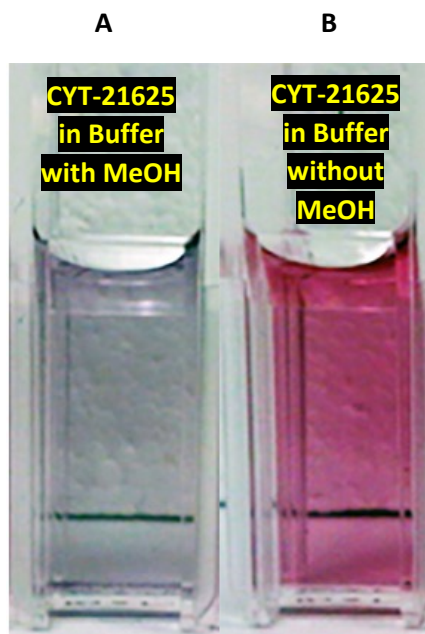

**Figure S2.** A. Induction of gold nanoparticle agglomeration and precipitation following incubation of CYT-21625 in releasing buffer containing BME+50% MeOH. The image shows that the gold particles (which are typically cherry red in color) undergo agglomeration (the grey/black color; as the particles release surface bound agents (i.e., compound **5**)). B. The same experiment conducted in the absence of MeOH. Here the particles appear to be monodispersed and are not undergoing agglomeration.

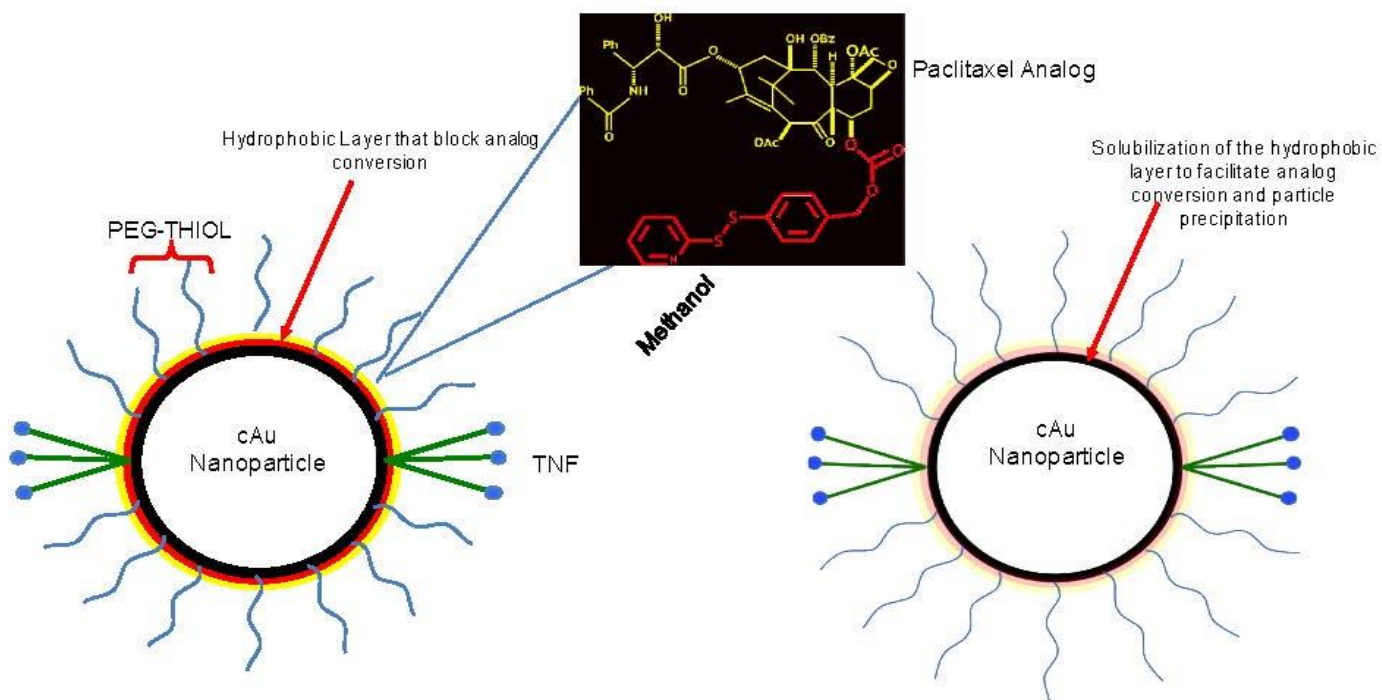

**Figure S3.** Hypothetical hydrophobic layer of paclitaxel on the gold nanoparticle surface reducing susceptibility to hydrolytic or reductive conversion to paclitaxel. Addition of MeOH solubilizes this layer and facilitates paclitaxel release.
